# Supplementary material for: An Analytic Expression for the Inverse Involute
Source: Hindawi journal article supplement (doi:10.1155/2019/3586012), 2019-01-01
Supplement: f1 [file 3586012.f1.xlsx]

## Sheet: Hoja1
															Valid Range
						u (Pressure angle)	u (rad)	x=inv(u)	Apsol5	Err Apsol5 (rad)	Cheng 9	Err Cheng 9 (rad)	Liu1	Err Liu1 (rad)	Aux	Liu2	Err Liu2 (rad)	Err Liu2 (grad)	Err Liu 2 (")	AL 1	Err AL1	AL2	Err AL2
						0	0	0	0	0	0	0	0	0	0	#DIV/0!	#DIV/0!	#DIV/0!	#DIV/0!	0	0	0	0
						1	0.0174533	1.77241e-06	0.0174534	-1.06913e-07	0.0174533	1.2837e-16	0.0174533	1.249e-16	0.0174551	0.0174533	1.75207e-15	1.00386e-13	3.61391e-10	0.01751	-5.67023e-05	0.0174552	-1.87643e-06
						2	0.0349066	1.41845e-05	0.0349068	-2.09758e-07	0.0349066	-2.08167e-16	0.0349066	-2.15106e-16	0.0349208	0.0349066	1.06165e-15	6.08281e-14	2.18981e-10	0.0350072	-0.000100643	0.03491	-3.42359e-06
						3	0.0523599	4.79017e-05	0.0523602	-3.04589e-07	0.0523599	1.2837e-15	0.0523599	7.77156e-16	0.0524078	0.0523599	-7.42462e-16	-4.25399e-14	-1.53144e-10	0.0524928	-0.000132886	0.0523645	-4.65665e-06
						4	0.0698132	0.000113642	0.0698136	-3.87694e-07	0.0698132	-3.33067e-16	0.0698132	-6.59195e-15	0.0699268	0.0698132	-5.41234e-16	-3.10104e-14	-1.11637e-10	0.0699676	-0.000154479	0.0698188	-5.59103e-06
						5	0.0872665	0.000222201	0.0872669	-4.55715e-07	0.0872665	-8.60423e-16	0.0872665	-4.76563e-14	0.0874887	0.0872665	-1.12271e-14	-6.43267e-13	-2.31576e-09	0.0874329	-0.000166453	0.0872727	-6.24256e-06
						6	0.10472	0.00038448	0.10472	-5.05753e-07	0.10472	-3.05311e-16	0.10472	-2.41959e-13	0.105104	0.10472	-4.1897e-14	-2.40052e-12	-8.64189e-09	0.10489	-0.000169825	0.104726	-6.6276e-06
						7	0.122173	0.000611513	0.122174	-5.35475e-07	0.122173	-4.44089e-16	0.122173	-9.70835e-13	0.122785	0.122173	-1.3517e-13	-7.74465e-12	-2.78807e-08	0.122339	-0.000165592	0.12218	-6.76313e-06
						8	0.139626	0.000914495	0.139627	-5.432e-07	0.139626	-4.44089e-16	0.139626	-3.23847e-12	0.140541	0.139626	-3.69677e-13	-2.11809e-11	-7.62513e-08	0.139781	-0.000154733	0.139633	-6.6669e-06
						9	0.15708	0.00130481	0.15708	-5.27988e-07	0.15708	4.996e-16	0.15708	-9.38052e-12	0.158385	0.15708	-8.80407e-13	-5.04436e-11	-1.81597e-07	0.157218	-0.000138206	0.157086	-6.3575e-06
						10	0.174533	0.00179406	0.174533	-4.89706e-07	0.174533	-4.44089e-16	0.174533	-2.43147e-11	0.176328	0.174533	-1.89784e-12	-1.08738e-10	-3.91458e-07	0.17465	-0.000116948	0.174539	-5.85445e-06
						11	0.191986	0.00239409	0.191987	-4.29079e-07	0.191986	-2.22045e-16	0.191986	-5.75947e-11	0.194382	0.191986	-3.75283e-12	-2.15021e-10	-7.74077e-07	0.192078	-9.1874e-05	0.191991	-5.17827e-06
						12	0.20944	0.00311705	0.20944	-3.47731e-07	0.20944	0	0.20944	-1.26663e-10	0.212558	0.20944	-6.91433e-12	-3.96162e-10	-1.42618e-06	0.209503	-6.38724e-05	0.209444	-4.35057e-06
						13	0.226893	0.00397539	0.226893	-2.48192e-07	0.226893	0	0.226893	-2.61742e-10	0.230871	0.226893	-1.20023e-11	-6.87679e-10	-2.47564e-06	0.226927	-3.38056e-05	0.226896	-3.39402e-06
						14	0.244346	0.00498191	0.244346	-1.33893e-07	0.244346	0	0.244346	-5.12965e-10	0.249331	0.244346	-1.97885e-11	-1.1338e-09	-4.08167e-06	0.244349	-2.50732e-06	0.244348	-2.3324e-06
						15	0.261799	0.0061498	0.261799	-9.1275e-09	0.261799	0	0.261799	-9.60505e-10	0.267954	0.261799	-3.11937e-11	-1.78726e-09	-6.43415e-06	0.26177	2.92202e-05	0.261801	-1.19058e-06
						16	0.279253	0.00749271	0.279253	1.21019e-07	0.279253	0	0.279253	-1.72859e-09	0.286751	0.279253	-4.72561e-11	-2.70758e-09	-9.74728e-06	0.279192	6.06085e-05	0.279253	5.5411e-09
						17	0.296706	0.00902471	0.296706	2.50772e-07	0.296706	0	0.296706	-3.00451e-09	0.305738	0.296706	-6.90931e-11	-3.95874e-09	-1.42515e-05	0.296615	9.09262e-05	0.296705	1.22911e-06
						18	0.314159	0.0107604	0.314159	3.73814e-07	0.314159	0	0.314159	-5.06405e-09	0.324929	0.314159	-9.78302e-11	-5.60526e-09	-2.01789e-05	0.31404	0.000119482	0.314157	2.45245e-06
						19	0.331613	0.0127151	0.331612	4.83475e-07	0.331613	0	0.331613	-8.30482e-09	0.344338	0.331613	-1.34522e-10	-7.70752e-09	-2.77471e-05	0.331467	0.000145629	0.331609	3.6472e-06
						20	0.349066	0.0149044	0.349065	5.72976e-07	0.349066	0	0.349066	-1.32895e-08	0.363983	0.349066	-1.8005e-10	-1.03161e-08	-3.71379e-05	0.348897	0.000168768	0.349061	4.78457e-06
						21	0.366519	0.0173449	0.366519	6.35726e-07	0.366519	0	0.366519	-2.08015e-08	0.383879	0.366519	-2.35013e-10	-1.34653e-08	-4.84749e-05	0.366331	0.000188352	0.366513	5.83558e-06
						22	0.383972	0.0200538	0.383972	6.65694e-07	0.383972	-6.10623e-16	0.383972	-3.1915e-08	0.404044	0.383972	-2.99614e-10	-1.71666e-08	-6.17998e-05	0.383769	0.000203894	0.383966	6.77144e-06
						23	0.401426	0.0230491	0.401425	6.57846e-07	0.401426	-1.38778e-15	0.401426	-4.80838e-08	0.424496	0.401426	-3.73542e-10	-2.14024e-08	-7.70486e-05	0.401211	0.000214969	0.401418	7.56391e-06
						24	0.418879	0.0263497	0.418878	6.08676e-07	0.418879	-2.38698e-15	0.418879	-7.12515e-08	0.445253	0.418879	-4.55878e-10	-2.61199e-08	-9.40317e-05	0.418658	0.000221223	0.418871	8.18582e-06
						25	0.436332	0.0299753	0.436332	5.16819e-07	0.436332	-5.71765e-15	0.436332	-1.03988e-07	0.466335	0.436332	-5.45018e-10	-3.12272e-08	-0.000112418	0.43611	0.000222381	0.436324	8.61168e-06
						26	0.453786	0.033947	0.453785	3.8379e-07	0.453786	-1.26565e-14	0.453786	-1.49658e-07	0.487763	0.453786	-6.38624e-10	-3.65905e-08	-0.000131726	0.453567	0.000218251	0.453777	8.81832e-06
						27	0.471239	0.0382866	0.471239	2.14826e-07	0.471239	-2.7478e-14	0.471239	-2.12625e-07	0.50956	0.471239	-7.33635e-10	-4.20342e-08	-0.000151323	0.47103	0.000208741	0.47123	8.78575e-06
						28	0.488692	0.0430172	0.488692	1.9879e-08	0.488692	-5.73985e-14	0.488692	-2.985e-07	0.531747	0.488692	-8.26313e-10	-4.73442e-08	-0.000170439	0.488498	0.000193859	0.488684	8.49808e-06
						29	0.506145	0.0481636	0.506146	-1.85238e-07	0.506145	-1.17795e-13	0.506146	-4.14444e-07	0.554351	0.506145	-9.12356e-10	-5.22742e-08	-0.000188187	0.505972	0.000173734	0.506138	7.94462e-06
						30	0.523599	0.0537515	0.523599	-3.7753e-07	0.523599	-2.36033e-13	0.523599	-5.69525e-07	0.577395	0.523599	-9.87084e-10	-5.65558e-08	-0.000203601	0.52345	0.000148624	0.523592	7.12118e-06
						31	0.541052	0.0598086	0.541053	-5.25294e-07	0.541052	-4.65517e-13	0.541053	-7.75153e-07	0.600909	0.541052	-1.04567e-09	-5.99127e-08	-0.000215686	0.540933	0.000118933	0.541046	6.0315e-06
						32	0.558505	0.066364	0.558506	-5.86366e-07	0.558505	-9.01612e-13	0.558506	-1.04559e-06	0.624921	0.558505	-1.08346e-09	-6.2078e-08	-0.000223481	0.55842	8.52244e-05	0.558501	4.68901e-06
						33	0.575959	0.0734489	0.575959	-5.06107e-07	0.575959	-1.71863e-12	0.57596	-1.39856e-06	0.649461	0.575959	-1.09632e-09	-6.28144e-08	-0.000226132	0.57591	4.82441e-05	0.575956	3.1187e-06
						34	0.593412	0.0810966	0.593412	-2.1509e-07	0.593412	-3.22598e-12	0.593414	-1.85597e-06	0.674564	0.593412	-1.081e-09	-6.19369e-08	-0.000222973	0.593403	8.93821e-06	0.593411	1.35946e-06
						35	0.610865	0.0893423	0.610865	3.7355e-07	0.610865	-5.97244e-12	0.610868	-2.44472e-06	0.700264	0.610865	-1.03562e-09	-5.93364e-08	-0.000213611	0.610897	-3.15214e-05	0.610866	-5.33418e-07
						36	0.628319	0.098224	0.628317	1.36716e-06	0.628319	-1.09145e-11	0.628322	-3.19771e-06	0.7266	0.628319	-9.59982e-10	-5.50029e-08	-0.000198011	0.62839	-7.17105e-05	0.628321	-2.48523e-06
						37	0.645772	0.107782	0.645769	2.89702e-06	0.645772	-1.97052e-11	0.645776	-4.15498e-06	0.75361	0.645772	-8.56016e-10	-4.90461e-08	-0.000176566	0.645882	-0.000109922	0.645776	-4.39849e-06
						38	0.663225	0.118061	0.66322	5.1224e-06	0.663225	-3.51783e-11	0.66323	-5.36495e-06	0.78134	0.663225	-7.28012e-10	-4.1712e-08	-0.000150163	0.663369	-0.00014413	0.663231	-6.14901e-06
						39	0.680678	0.129106	0.68067	8.23505e-06	0.680678	-6.21498e-11	0.680685	-6.886e-06	0.809835	0.680678	-5.82823e-10	-3.33933e-08	-0.000120216	0.68085	-0.000171952	0.680686	-7.58143e-06
						40	0.698132	0.140968	0.698119	1.24645e-05	0.698132	-1.0874e-10	0.69814	-8.78807e-06	0.839145	0.698132	-4.29876e-10	-2.46301e-08	-8.86682e-05	0.698322	-0.000190602	0.69814	-8.50411e-06
						41	0.715585	0.153702	0.715567	1.80841e-05	0.715585	-1.88554e-10	0.715596	-1.11546e-05	0.869326	0.715585	-2.81004e-10	-1.61003e-08	-5.79612e-05	0.715782	-0.000196838	0.715594	-8.6832e-06
						42	0.733038	0.167366	0.733013	2.54177e-05	0.733038	-3.24234e-10	0.733052	-1.40847e-05	0.900434	0.733038	-1.50044e-10	-8.59686e-09	-3.09487e-05	0.733225	-0.000186906	0.733046	-7.83586e-06
						43	0.750492	0.182024	0.750457	3.4848e-05	0.750492	-5.53269e-10	0.750509	-1.76953e-05	0.932534	0.750492	-5.21764e-11	-2.98949e-09	-1.07621e-05	0.750648	-0.000156469	0.750497	-5.6225e-06
						44	0.767945	0.197744	0.767898	4.68254e-05	0.767945	-9.37409e-10	0.767967	-2.21235e-05	0.965693	0.767945	-2.99949e-12	-1.71858e-10	-6.18689e-07	0.768045	-0.000100529	0.767947	-1.63776e-06
						45	0.785398	0.214602	0.785336	6.18785e-05	0.785398	-1.57792e-09	0.785426	-2.75295e-05	0.999988	0.785398	-1.73245e-11	-9.92619e-10	-3.57343e-06	0.785412	-1.33405e-05	0.785394	4.5998e-06
						46	0.802851	0.232679	0.802771	8.06262e-05	0.802851	-2.64024e-09	0.802886	-3.40986e-05	1.0355	0.802851	-1.07726e-10	-6.17222e-09	-2.222e-05	0.80274	0.000111698	0.802838	1.36597e-05
						47	0.820305	0.252064	0.820201	0.000103792	0.820305	-4.39375e-09	0.820347	-4.20436e-05	1.07232	0.820305	-2.82892e-10	-1.62085e-08	-5.83508e-05	0.820023	0.000282162	0.820279	2.62132e-05
						48	0.837758	0.272854	0.837626	0.00013222	0.837758	-7.27585e-09	0.83781	-5.16066e-05	1.11053	0.837758	-5.45869e-10	-3.1276e-08	-0.000112594	0.837251	0.000506739	0.837715	4.30497e-05
						49	0.855211	0.295157	0.855044	0.000166895	0.855211	-1.19952e-08	0.855274	-6.30596e-05	1.15026	0.855211	-8.92306e-10	-5.11254e-08	-0.000184051	0.854416	0.000795397	0.855146	6.50946e-05
						50	0.872665	0.319089	0.872456	0.00020896	0.872665	-1.9698e-08	0.872741	-7.67037e-05	1.19162	0.872665	-1.3089e-09	-7.49944e-08	-0.00026998	0.871505	0.00115957	0.872571	9.34317e-05
						51	0.890118	0.344779	0.889858	0.000259747	0.890118	-3.22355e-08	0.890211	-9.28651e-05	1.23473	0.890118	-1.77224e-09	-1.01542e-07	-0.00036555	0.888506	0.00161237	0.889989	0.000129328
						52	0.907571	0.37237	0.90725	0.000320806	0.907571	-5.25963e-08	0.907683	-0.000111888	1.27974	0.907571	-2.24836e-09	-1.28821e-07	-0.000463757	0.905402	0.00216888	0.907397	0.000174262
						53	0.925025	0.40202	0.924631	0.000393935	0.925025	-8.56038e-08	0.925159	-0.000134121	1.32681	0.925025	-2.69332e-09	-1.54316e-07	-0.000555537	0.922178	0.00284643	0.924795	0.000229961
						54	0.942478	0.433904	0.941997	0.000481226	0.942478	-1.39045e-07	0.942638	-0.000159893	1.37612	0.942478	-3.05526e-09	-1.75053e-07	-0.000630192	0.938813	0.00366497	0.942179	0.000298438
						55	0.959931	0.468217	0.959346	0.000585111	0.959931	-2.25502e-07	0.960121	-0.000189477	1.42785	0.959931	-3.27835e-09	-1.87836e-07	-0.000676208	0.955284	0.00464753	0.959549	0.000382041
						56	0.977384	0.505177	0.976676	0.000708419	0.977385	-3.65337e-07	0.977607	-0.000223034	1.48224	0.977384	-3.30923e-09	-1.89605e-07	-0.000682578	0.971564	0.00582069	0.976901	0.000483509
						57	0.994838	0.545027	0.993983	0.000854443	0.994838	-5.91566e-07	0.995098	-0.000260523	1.53954	0.994838	-3.10648e-09	-1.77988e-07	-0.000640757	0.987622	0.00721526	0.994232	0.00060604
						58	1.01229	0.588044	1.01126	0.00102702	1.01229	-9.57861e-07	1.01259	-0.000301577	1.60001	1.01229	-2.65368e-09	-1.52045e-07	-0.000547361	1.00342	0.00886699	1.01154	0.000753367
						59	1.02974	0.634535	1.02851	0.00123062	1.02975	-1.55176e-06	1.03009	-0.000345304	1.66397	1.02974	-1.97689e-09	-1.13267e-07	-0.000407762	1.01893	0.0108175	1.02881	0.000929854
						60	1.0472	0.684853	1.04573	0.00147048	1.0472	-2.51657e-06	1.04759	-0.000389997	1.7318	1.0472	-1.16678e-09	-6.68514e-08	-0.000240665	1.03408	0.0131153	1.04606	0.00114061
						61	1.06465	0.739397	1.0629	0.00175272	1.06465	-4.08804e-06	1.06508	-0.000432714	1.80388	1.06465	-4.06304e-10	-2.32795e-08	-8.38061e-05	1.04883	0.0158172	1.06326	0.00139163
						62	1.0821	0.798622	1.08002	0.00208452	1.08211	-6.65592e-06	1.08257	-0.000468636	1.88071	1.0821	-3.97837e-12	-2.27944e-10	-8.20598e-07	1.06311	0.0189903	1.08041	0.00168994
						63	1.09956	0.863053	1.09708	0.0024743	1.09957	-1.08687e-05	1.10005	-0.000490132	1.96281	1.09956	-4.33e-10	-2.48091e-08	-8.93127e-05	1.07684	0.0227132	1.09751	0.00204382
						64	1.11701	0.933293	1.11408	0.00293203	1.11703	-1.78127e-05	1.1175	-0.000485347	2.05082	1.11701	-2.37592e-09	-1.3613e-07	-0.000490068	1.08993	0.0270796	1.11455	0.00246306
						65	1.13446	1.01004	1.13099	0.00346943	1.13449	-2.93224e-05	1.1349	-0.000436098	2.14546	1.13446	-6.77402e-09	-3.88123e-07	-0.00139724	1.10226	0.0322007	1.1315	0.00295921
						66	1.15192	1.09412	1.14782	0.00410047	1.15197	-4.85233e-05	1.15223	-0.000314692	2.2476	1.15192	-1.48799e-08	-8.52557e-07	-0.0030692	1.11371	0.0382098	1.14837	0.00354602
						67	1.16937	1.18648	1.16453	0.00484171	1.16945	-8.07942e-05	1.16945	-7.90767e-05	2.35825	1.16937	-2.83108e-08	-1.62209e-06	-0.00583952	1.1241	0.0452674	1.16513	0.00423984
						68	1.18682	1.28826	1.18111	0.005713	1.18696	-0.000135498	1.18649	0.000334601	2.4786	1.18682	-4.90981e-08	-2.81311e-06	-0.0101272	1.13326	0.0535678	1.18176	0.00506027
						69	1.20428	1.40081	1.19754	0.00673815	1.20451	-0.000229138	1.20325	0.00102357	2.61012	1.20428	-7.97287e-08	-4.56812e-06	-0.0164452	1.14093	0.063348	1.19825	0.00603082
						70	1.22173	1.52575	1.21378	0.00794589	1.22212	-0.00039123	1.21959	0.00213666	2.75453	1.22173	-1.23168e-07	-7.05702e-06	-0.0254053	1.14683	0.0748995	1.21455	0.00717994
